# Supplementary material for: Chemical sensor thin film-based carbon quantum dots (CQDs) for the detection of heavy metal count in various water matrices
Source: Royal Society of Chemistry journal article supplement (doi:10.1039/d3an01571h), 2024-01-01
Supplement: d3an01571h1.pdf [file d3an01571h1.pdf]

## Supplementary Information

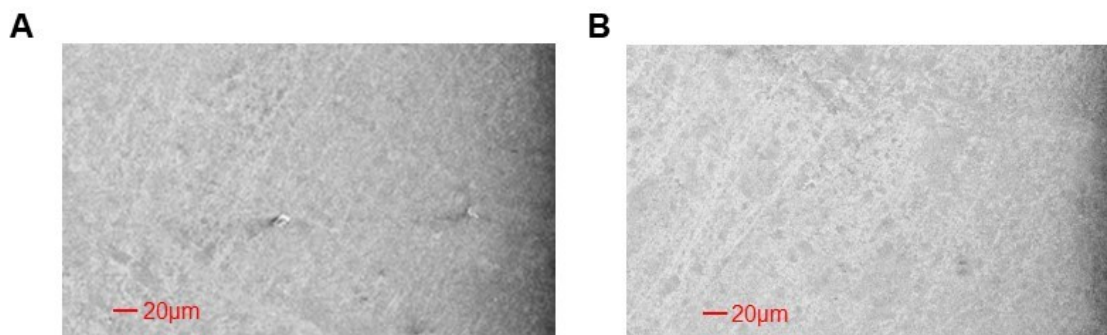

**Figure S1:** SEM images of: A) PVA thin film, B) PVA-CQDs thin film

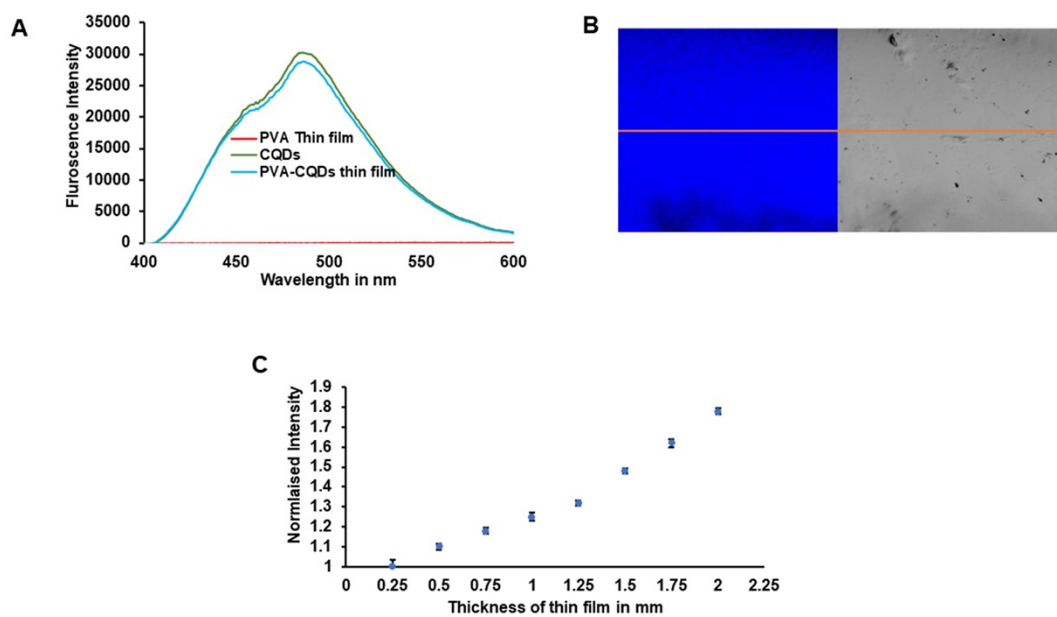

**Figure S2:** Characterization of synthesized CQDs thin film: A) Fluorescence emission of PVA, CQDs & PVA-CQDs thin film, B) CLSM analysis of CQDs thin film and C) Effect of thickness of fluorescence emission of CQDs thin film,
